# Supplementary material
Source: Springer Nature journal article supplement (https://www.springermedizin.de/resource/supplementary/12955_2012_1134_MOESM2_ESM.pdf/9559358)
Supplement: MOESM2 [file 9559358]

**Additional file 2 – Path diagram of CFA**

Path model for the 2-factor solution in the Confirmatory Factor Analysis (CFA) using follow-up data with all countries pooled. GFI=0.82, Model AIC = 93.69

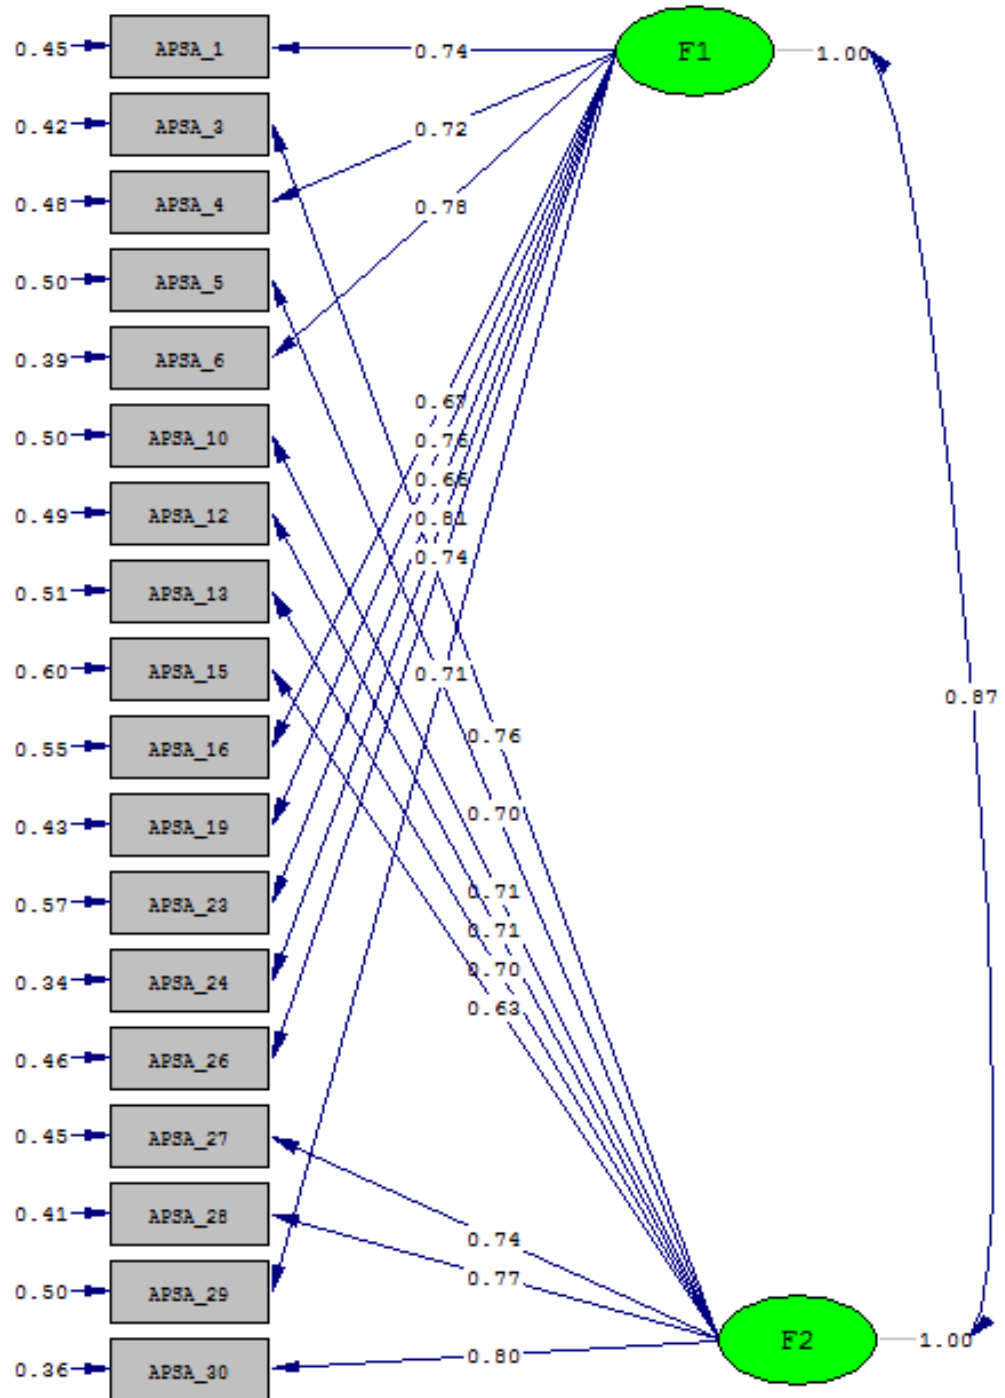

Chi-Square=319.69, df=134, P-value=0.00000, RMSEA=0.092
